# Supplementary figures and images for: Rationalising antibiotic use after low-risk vaginal deliveries in a hospital setting in India
Source: PubMed Central journal article supplement — BMJ Open Qual. 2021 Aug 3;10(Suppl 1):e001413. doi: 10.1136/bmjoq-2021-001413 (PMC8336128; doi:10.1136/bmjoq-2021-001413), 2021-08-03

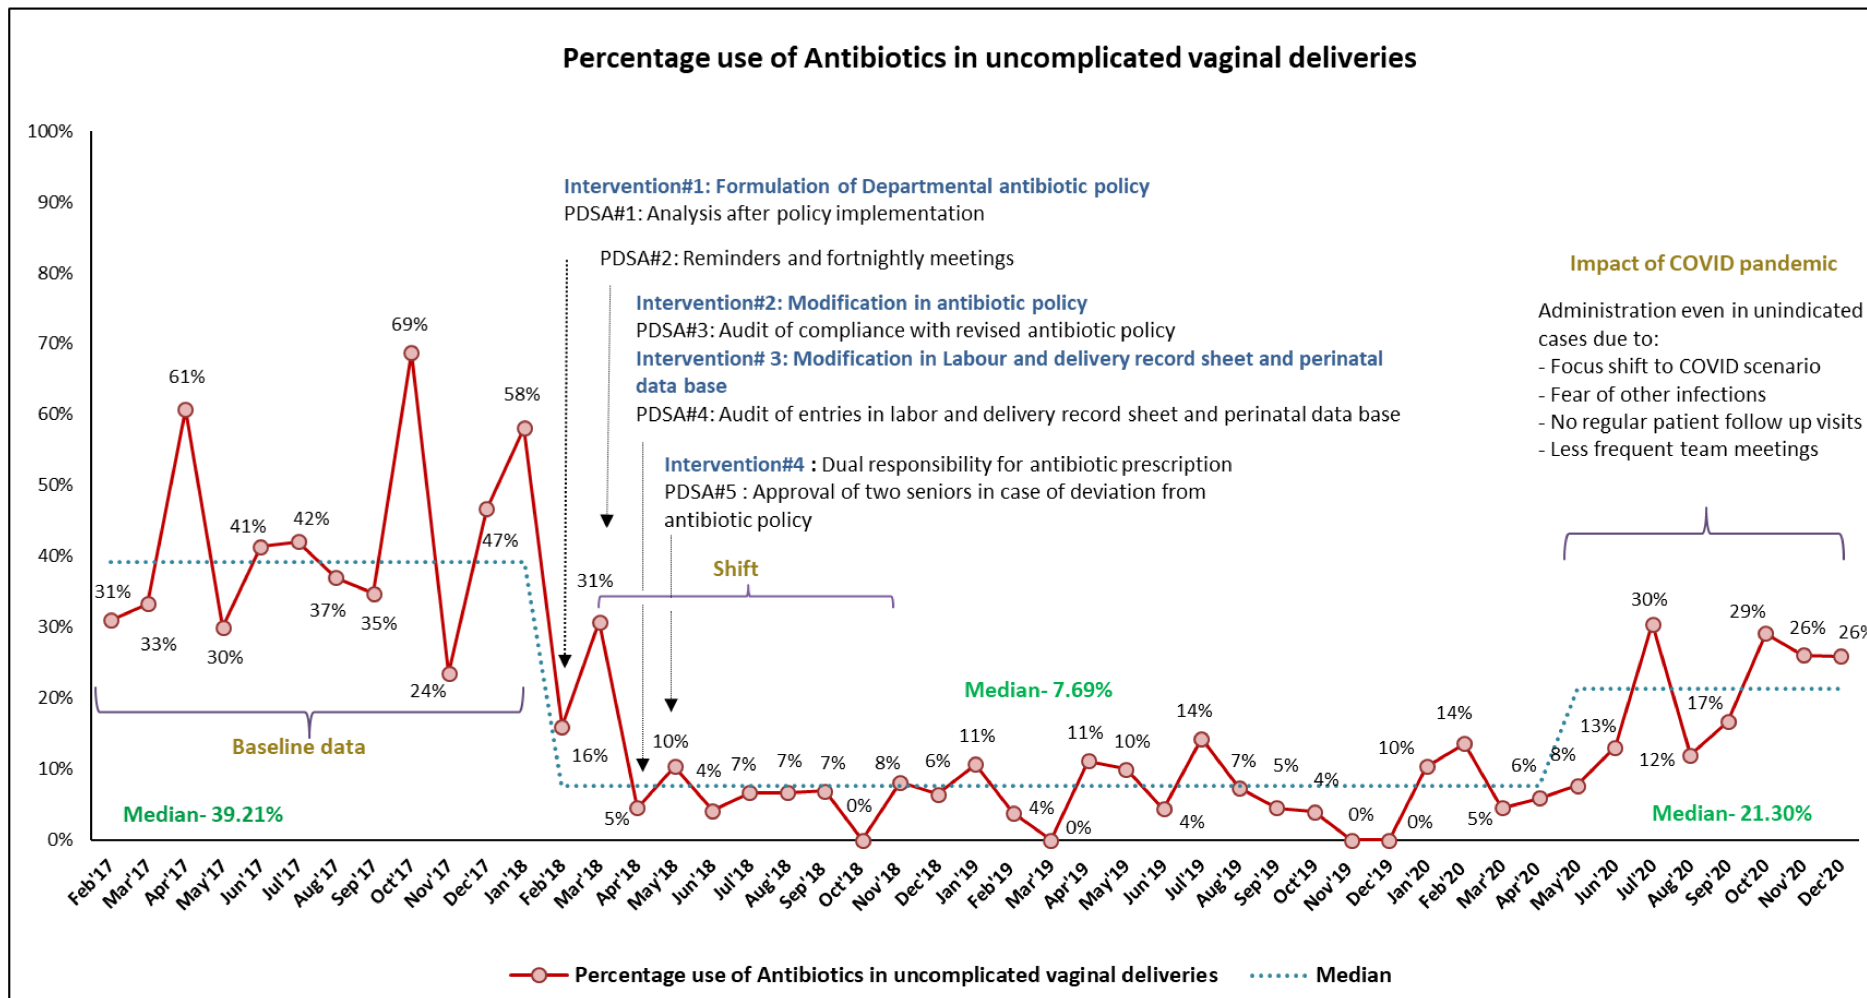

Supplement: bmjoq-2021-001413supp001.pdf [file bmjoq-2021-001413supp001.pdf]
